# Supplementary material for: Disability among Older People: Analysis of Data from Disability Surveys in Six Low- and Middle-Income Countries
Source: MDPI journal article supplement (doi:10.3390/ijerph18136962), 2021-06-29
Supplement: s1 [file s1]

**Table S1.** Details of surveys included in this secondary data analysis.

| Site                                            | Year of Survey | Sampling Method                                                                                                                                                   | Total Participants (Number 60+ Years) | Tool and Definition of Disability ('Case')                                                                                                                                                                                                                                                                                                               | Reporting Approach | Case Control Study: Matching Criteria for Selecting Controls |
|-------------------------------------------------|----------------|-------------------------------------------------------------------------------------------------------------------------------------------------------------------|---------------------------------------|----------------------------------------------------------------------------------------------------------------------------------------------------------------------------------------------------------------------------------------------------------------------------------------------------------------------------------------------------------|--------------------|--------------------------------------------------------------|
| Cameroon Fundong Health District, West Cameroon | 2011           | Clusters: 51 clusters of 80 people selected using PPS;<br>Households within clusters: modified compact segment sampling;<br>Sampling Frame: Indian Census 2011    | 3567 (429)                            | Washington Group Extended Set on Functioning/Short Set Enhanced<br>"A lot of difficulty" or "cannot do" in any of following domains: seeing, hearing, walking or climbing steps, understanding, being understood, remembering, concentrating, self-care, upper body strength, fine motor dexterity, and/or reporting "a lot" of anxiety/depression daily | Self-report        | Age (+/- 5 years), sex, cluster                              |
| Guatemala National                              | 2016           | Clusters: 280 clusters of 50 people selected using PPS;<br>Households within clusters: modified compact segment sampling;<br>Sampling Frame: National Census 2002 | 13073 (1148)                          |                                                                                                                                                                                                                                                                                                                                                          | Self-report        | Age (+/- 10 years), sex, cluster                             |

|                 |                                                        |      |                                                                                                                                                              |  |            |                                                                          |                                 |
|-----------------|--------------------------------------------------------|------|--------------------------------------------------------------------------------------------------------------------------------------------------------------|--|------------|--------------------------------------------------------------------------|---------------------------------|
| <b>India</b>    | Northern half of Mahbubnagar District, Telangana State | 2012 | Clusters: 51 clusters of 80 people selected using PPS; Households within clusters: modified compact segment sampling; Sampling Frame: Indian Census 2011     |  | 3543 (352) | Self-report                                                              | Age (+/- 5 years), sex, cluster |
|                 |                                                        |      |                                                                                                                                                              |  |            |                                                                          |                                 |
| <b>Maldives</b> | National                                               | 2017 | Clusters: 52 clusters of 1250 people selected using PPS; Households within clusters: modified compact segment sampling; Sampling Frame: Maldives Census 2014 |  | 5513 (449) | Self-report or proxy report if participant unavailable after 3+ attempts | Age (+/- 5 years), sex, cluster |
|                 |                                                        |      |                                                                                                                                                              |  |            |                                                                          |                                 |
| <b>Nepal</b>    | Tanahun, Province No 4                                 | 2016 | Clusters: 30 clusters of 200 people selected using PPS; Households within clusters: modified compact segment sampling;                                       |  | 6162 (915) | Self-report or proxy report if participant unavailable                   | Age (+/- 5 years), sex, cluster |
|                 |                                                        |      |                                                                                                                                                              |  |            |                                                                          |                                 |

|                         |      |                                                                                                                                                                                                       |            |                                                                                                                                                                              |                                                                              |                                 |
|-------------------------|------|-------------------------------------------------------------------------------------------------------------------------------------------------------------------------------------------------------|------------|------------------------------------------------------------------------------------------------------------------------------------------------------------------------------|------------------------------------------------------------------------------|---------------------------------|
|                         |      | Sampling Frame:<br>National Population and Housing<br>Census 20011                                                                                                                                    |            |                                                                                                                                                                              |                                                                              |                                 |
|                         |      |                                                                                                                                                                                                       |            |                                                                                                                                                                              |                                                                              |                                 |
| Haiti<br>Port au Prince | 2011 | Clusters: 60 clusters of 50 people selected using PPS;<br>Households within clusters: modified compact segment sampling;<br>Sampling Frame: National Population and Housing Census of Haiti from 2003 | 3132 (206) | WG Short Set<br>“Some difficulty” in at least 2 domains, or “a lot of difficulty/can’t” in at least 1 domain: seeing, hearing, mobility, cognition, self-care, communication | Household heads provided proxy-report, then cases confirmed with self-report | Age (+/- 3 years), sex, cluster |
|                         |      |                                                                                                                                                                                                       |            |                                                                                                                                                                              |                                                                              |                                 |
